# Supplementary material for: Detection of intracellular microRNA-21 for cancer diagnosis by a nanosystem containing a ZnO@polydopamine and DNAzyme probe
Source: Royal Society of Chemistry journal article supplement (doi:10.1039/d4ra00636d), 2024-01-01
Supplement: d4ra00636d1.pdf [file d4ra00636d1.pdf]

## Supporting Information

### Target triggered ratiometric fluorescence assay of intracellular microRNA-21 with a nanosystem containing ZnO@polydopamine and DNAzyme probe

Yuanyuan Liu<sup>1</sup>, RanRan Wang<sup>2</sup>, Fengxia Zhang<sup>1</sup>, Yongshan Ma<sup>1</sup>, Tianyi Jiang<sup>1\*</sup>

<sup>1</sup> School of Municipal and Environmental Engineering, Shandong Jianzhu University, Jinan 250101, Shandong, P. R. China.

<sup>2</sup> Yantai Engineering & Technology College, Yantai 264006, Shandong, P. R. China.

\* Corresponding author. (T. Jiang)

E-mail: jiangtianyi@sdjzu.edu.cn

#### Table of Contents

Fig. S1 The dynamic light scattering (DLS) measurement of ZnO ZnO nanoparticles (up) and ZnO@PDA (down).

Fig. S2 Time course of ZnO absorbance changes (370 nm) caused by ZnO decomposition at different pH.

Fig. S3 Fluorescence recovery of ZnO@PDA/F-DNA nanosystem caused by ZnO decomposition at different pH.

Fig. S4 Influence of the incubation time on fluorescence recovery (green FAM fluorescence signal versus red TAMRA fluorescence signal) in *in vitro* miRNA-21 detection.

Fig. S5 Influence of the miRNA-21 concentration on fluorescence recovery (green FAM fluorescence signal versus red TAMRA fluorescence signal) in *in vitro* miRNA-21 detection.

Fig. S6 Cell viability determined by MTT assay.

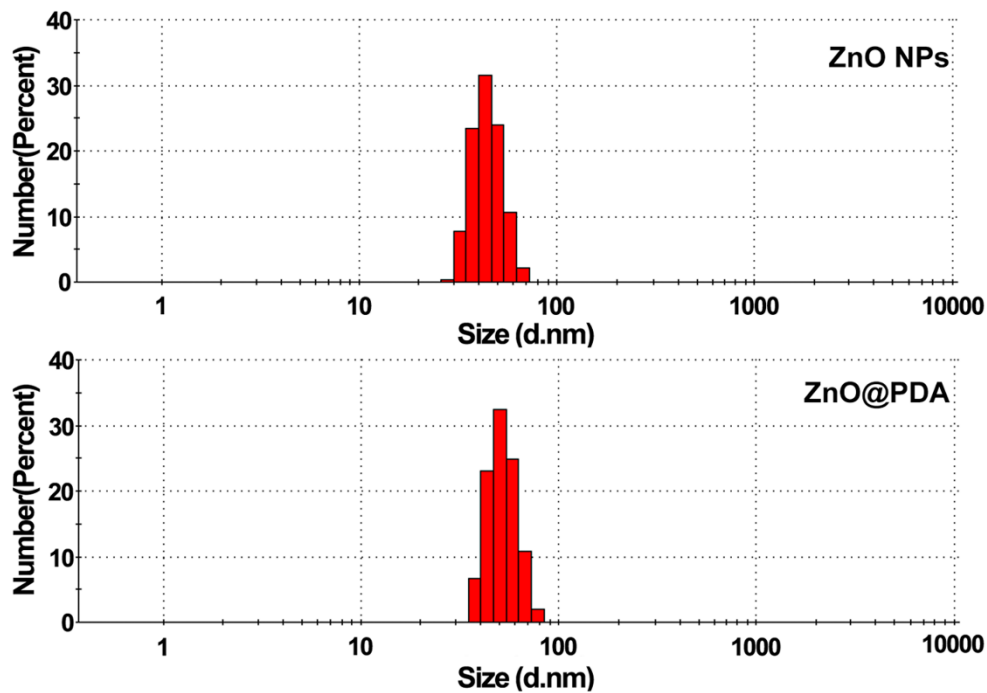

Fig. S1 The dynamic light scattering (DLS) measurement of ZnO nanoparticles (up) and ZnO@PDA (down). The average diameters of ZnO nanoparticles and ZnO@PDA were  $43.8 \pm 3.2$  nm and  $54.7 \pm 3.7$  nm, respectively.

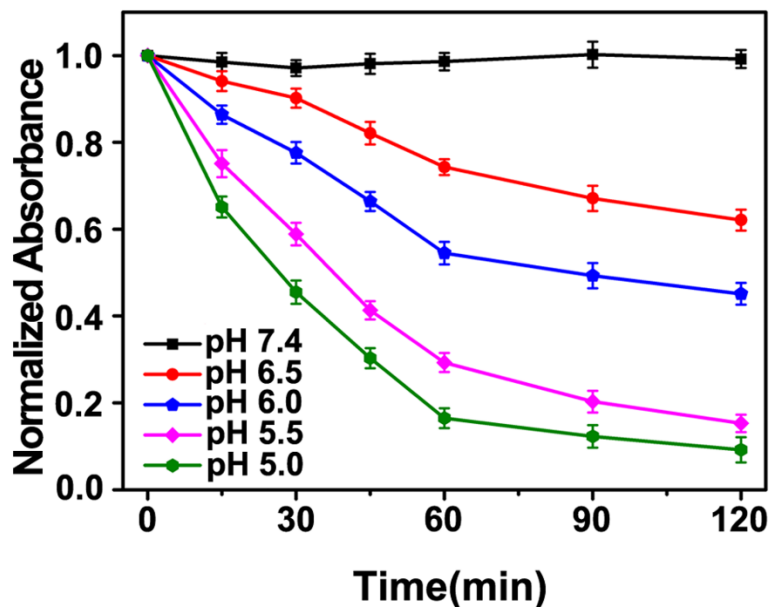

Fig. S2 Time course of ZnO absorbance changes (370 nm) caused by ZnO decomposition at different pH.

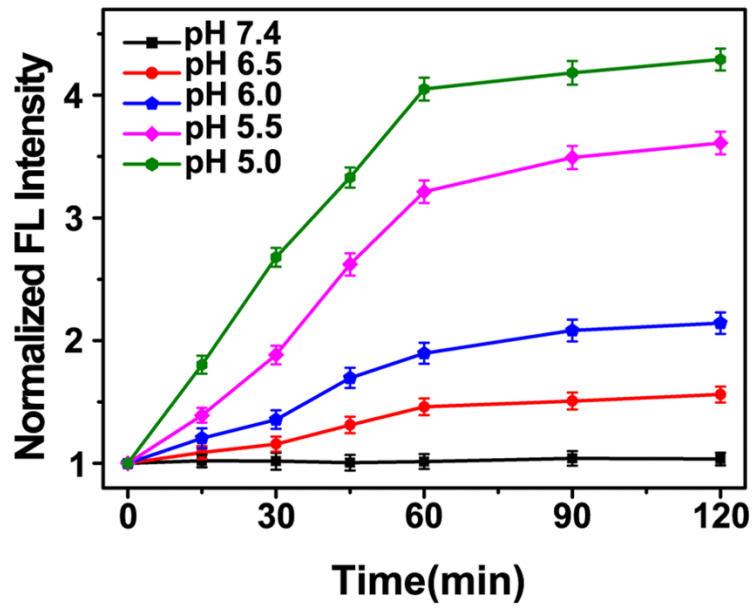

Fig. S3 Fluorescence recovery of ZnO@PDA/F-DNA nanosystem caused by ZnO decomposition at different pH.

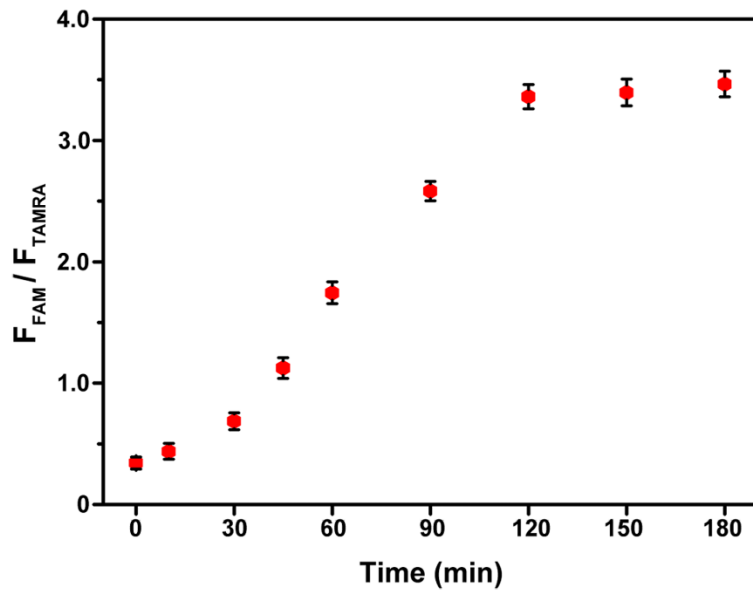

Fig. S4 Influence of the incubation time on fluorescence recovery (green FAM fluorescence signal versus red TAMRA fluorescence signal) in *in vitro* miRNA-21 detection.

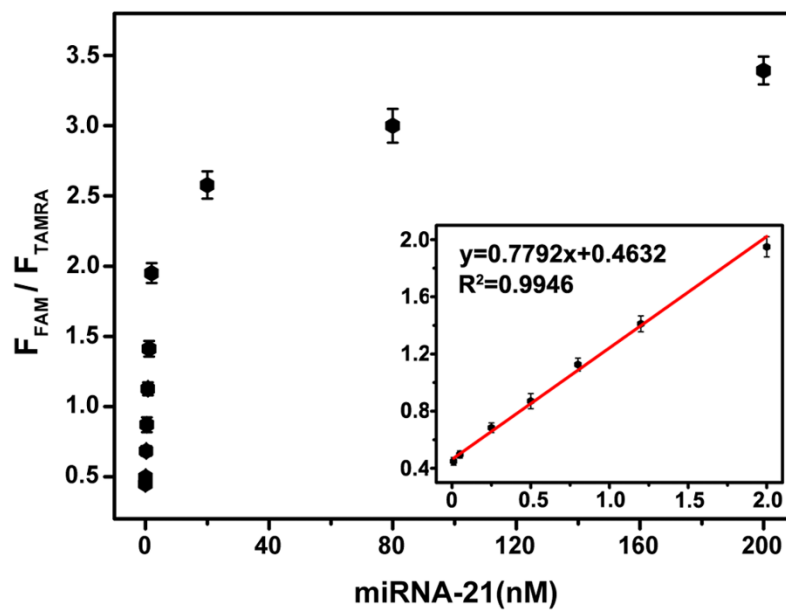

Fig. S5 Influence of the miRNA-21 concentration on fluorescence recovery (green FAM fluorescence signal versus red TAMRA fluorescence signal) in *in vitro* miRNA-21 detection. Insert: linear correlation between the fluorescence intensity ratio (FAM/TAMRA) and miRNA-21 concentration.

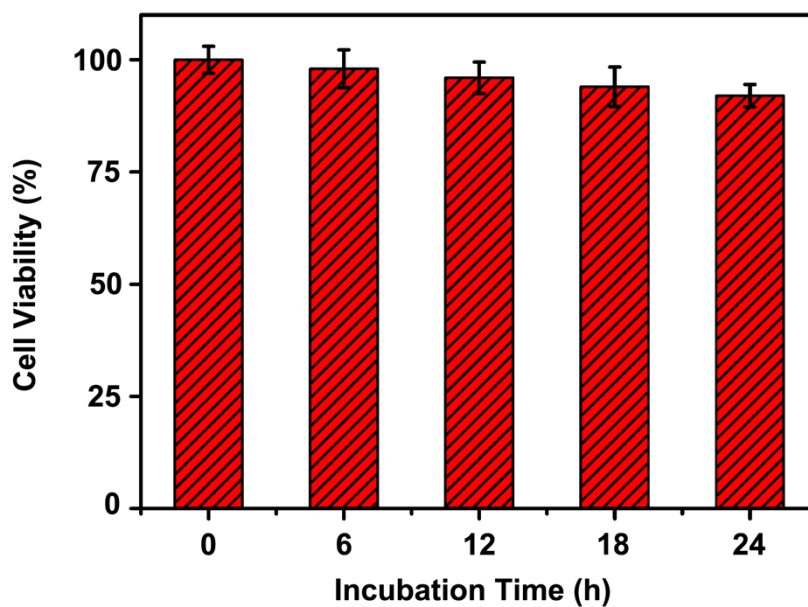

Fig. S6 Cell viability determined by MTT assay. L-02 cells were incubated with ZnO@PDA/probe nanosystem (20  $\mu\text{g}/\text{mL}$ ) for different times.
